# Supplementary material for: CRISPR/Cas9-assisted gRNA-free one-step genome editing with no sequence limitations and improved targeting efficiency
Source: PubMed Central journal article supplement (PMC5709385; doi:10.1038/s41598-017-16998-8), 2017-11-30
Supplement: 41598_2017_16998_MOESM1_ESM.pdf [file 41598_2017_16998_MOESM1_ESM.pdf]

## Table

Table S1. Primers for construction of pCAGO

| Name                | Sequence                                                      |
|---------------------|---------------------------------------------------------------|
| (pkd46)_forward     | CCAGGTCTCACCATGGATATTAATACTGAAACTGAGATCAAGC                   |
| (pkd46)_reverse     | CCAGGTCTCAATTTTTTATAACCTCCTTAGAGCTCGAATCCC                    |
| (cas9)_forward      | CCAGGTCTCAAAATGGATAAGAAATACTCAATAGGCTTAGATATCGGC              |
| (cas9)_N20A_reverse | CCAGGTCTCATTTCGGTTCGATGGACTAGCTAAGATCTGACTCCATAACAGAGTACTCGCC |
| (N20B)_gRNA_forward | CCAGGTCTCACGAAGTAGTTTTAGAGCTAGAAAATAGCAAGTTAAAATAAGGC         |
| (gRNA)_reverse      | CCAGGTCTCAGGAGAGAACATACTGGCTAAATACGGAAGG                      |
| (ptrc)_forward      | CCAGGTCTCACTCCATACGATATAAGTTGTAATTCTCATGTTG                   |
| (ptrc)_reverse      | CCAGGTCTCAATGGTATATCTCCTTGAATTCCATGGTC                        |

Table S2. Primers used for analysis of chromosomal areas most similar to the selected N20PAM<sup>a</sup>

| Primer Name | Sequence               |
|-------------|------------------------|
| N1G_F       | GATTGCGCTGTCAAAC       |
| N1G_R       | ATCACCGCAAAGTGAAG      |
| N2G_F       | GGCGGCATTTCGTATCGAAGAC |
| N2G_R       | TGGCCGATGGCATCAAAGG    |
| N3G_F       | CACCAGCATTGTCGGTTAC    |
| N3G_R       | AAGCCGTGAAGGAGTGAAAG   |
| N4G_F       | CGCGTTAATCACGTCTCTATCG |
| N4G_R       | TTTGATCTGGAGGCGCTAAAGG |
| N5G_F       | TTCACGGAATGCGGCAACC    |
| N5G_R       | AGCGAACGAAGCGGAACTG    |
| N6G_F       | GGAACACCAGGCGATGATGTC  |
| N6G_R       | GCACCACCTGCTGTATGATCC  |
| N7G_F       | ATGGCAGGCCAGAATGAC     |
| N7G_R       | CTGCTGCTGCAACTCAC      |
| N8G_F       | AAACCCGTCTGGTTCATACCC  |
| N8G_R       | GCCCTTCAACCAGAATATAAGC |
| N9G_F       | GGATGATGTTGGCTTCAG     |
| N9G_R       | TACGGCTTCGATATCACC     |

<sup>a</sup> : Chromosomal areas most similar to selected N20PAM were predicted by Cas-OFFinder

Table S3. N20PAM similar areas<sup>a</sup> sequences and analysis result after Cas9/gRNA expression

| number | similar DNA sequences   | Positions <sup>b</sup> | Mismatches | Positive colonies <sup>c</sup> /Tested |                      |
|--------|-------------------------|------------------------|------------|----------------------------------------|----------------------|
|        |                         |                        |            | pCAGO exp <sup>d</sup>                 | Pm4 exp <sup>e</sup> |
| 1      | cAGaCCAcCaAACCcAAGTgCGG | 29456                  | 6          | 10/10                                  | 10/10                |
| 2      | TAGTtCtgCaAAaCGAAGTgGGG | 608522                 | 6          | 10/10                                  | 10/10                |
| 3      | TgGcCaATCaAACaGAAaTATGG | 507357                 | 6          | 10/10                                  | 10/10                |

|   |                          |         |   |       |       |
|---|--------------------------|---------|---|-------|-------|
| 4 | TAAAACCATCtAcCgGAAtTACGG | 1067543 | 6 | 10/10 | 10/10 |
| 5 | TtcgCCATtGAAcTGAACtAAAGG | 1398303 | 6 | 10/10 | 10/10 |
| 6 | TgGTtCATCaAACCGcgGaAGGG  | 1580707 | 6 | 10/10 | 10/10 |
| 7 | TAtTaCAcCGAtCCGAAGaATGG  | 2247074 | 5 | 10/10 | 10/10 |
| 8 | gAGTctATCtAtCtGAACtATGG  | 3700191 | 6 | 10/10 | 10/10 |
| 9 | TAtgtaATCaAACCGAAaTACGG  | 4619275 | 6 | 10/10 | 10/10 |

<sup>a</sup> : Chromosomal areas most similar to selected N20PAM were predicted by Cas-OFFinder

<sup>b</sup> : Genome positions of *Escherichia coli* (K-12, MG1655) predicted by Cas-OFFinder

<sup>c</sup> : Strains with wild type *E. coli* MG1655 sequeunce identified with PCR amplified and DNA sequencing

<sup>d</sup> : N20PAM Similar areas were PCR amplified and sequenced to check off-target possibility after expression pCAGO

<sup>e</sup> : N20PAM Similar areas were PCR amplified and sequenced to check off-target possibility after editing editing experiment

pm4

Table S4 Primers for construction of editing cassettes and colony PCR identification

| Primers                | Sequence                                                                               | Characteristics                                 |
|------------------------|----------------------------------------------------------------------------------------|-------------------------------------------------|
| N20PAM_Cm_F            | <u>TTCATGTGCAGTCCATC</u> ACTGGAGCACCTCAAAAACACCA                                       |                                                 |
| N20PAM_Cm_R            | CAACGTCATCTCGTTCTCCGTTATTTGTTAACTGTAAATTGTCCTTACTTCGGTTCGATGGACTATTACGCCCGC<br>CCTGCCA | Selection marker - N20PAM<br>part amplification |
| Large_L500F            | CCACGGCTGTGATTAGAAC                                                                    |                                                 |
| Large_ReN20PAM2_L500R  | CCAGGTCTCetggTACCCGCCGAAGAAATTC                                                        |                                                 |
| ReN20PAM2BsaI_F        | CCAGGTCTCAaccgTTCATGTGCAGTCCATC                                                        |                                                 |
| ReN20PAM2_large_BsaI_R | CCAGGTCTCAaggeCAACGTCATCTCGTTCTC                                                       |                                                 |
| large_L10K_BSAI_R500F  | CCAGGTCTCAgect acacgccggtgaacggcgtagatctcagaaaacgctcGCGATTTCGTTGAGTACAG                |                                                 |
| large_L30K_BSAI_R500F  | CCAGGTCTCAgect tatatgctgtgatcgaagaacagtttgctggcgctgaGCGATTTCGTTGAGTACAG                |                                                 |
| large_L70K_BSAI_R500F  | CCAGGTCTCAgect ttacgatgaagcaccgctccggcagtggtgatggcctcaGCGATTTCGTTGAGTACAG              |                                                 |
| large_L100K_BSAI_R500F | CCAGGTCTCAgect ccaaagcagaatccaagctaatcctgatgctggcagGCGATTTCGTTGAGTACAG                 | Large genome deletion                           |
| large_R500R            | TGCGCTATCGAAAGTGAG                                                                     |                                                 |
| Large_genome_R         | TAGATGCGCCAGGATGCAG                                                                    |                                                 |
| Large_genome_10k_F     | ACCACCGAAGGGTATACG                                                                     |                                                 |
| Large_genome_30k_F     | CGCGCCGATTCTGTTTAGTTTC                                                                 |                                                 |
| Large_genome_70kA_F    | GAAGAGAACGTCGATCTAC                                                                    |                                                 |
| Large_genome_70kA_R    | CGAAGATATTGCCCTCTCAC                                                                   |                                                 |
| Large_genome_100kA_F   | GCGGTCAGCTGTATCAAC                                                                     |                                                 |
| Large_genome_100kA_R   | TGCCCTCTCACTTTCATCGG                                                                   |                                                 |
| Poxb_L500F             | CCCTCCGTCAGATGAACTAAAC                                                                 |                                                 |
| Poxb_L500BSAI_R        | CCAGGTCTCACTGGTAACACGACAACCGAAAC                                                       |                                                 |
| ReN20PAM2BSAI_F        | CCAGGTCTCAccAGTTCATGTGCAGTCCATC                                                        |                                                 |
| ReN20PAM2_poxb_BSAI_R  | CCAGGTCTCAgeCTGACAACCGAAACGCCACGGTTAAGCACCGCTTTGCGCATGCAACGTCATCTCGTTCTC               |                                                 |
| Poxb_R500BSAI_F        | CCAGGTCTCAaGGCACTGGTTCGGGATATCAAG                                                      | Poxb editing                                    |
| Poxb_R500R             | CGACCACCACATCCACCAACAC                                                                 |                                                 |
| kan_re_poxbfullF       | CCAGGTCTCAaggeCGTCGGAATTGCCAGCTGGG                                                     |                                                 |
| kan_re_fullR           | CCAGGTCTCAagteTCAGAAGAAGTCTGCAAGAAGGC                                                  |                                                 |
| poxb_kan_R500BSAI_F    | CCAGGTCTCAgaetACTGGTTCGGGATATCAAG                                                      |                                                 |

|                        |                                                                                  |                                   |
|------------------------|----------------------------------------------------------------------------------|-----------------------------------|
| poxb_genome_F          | CGCCTTATGCCCGATGATAATTC                                                          |                                   |
| poxb_genome_R          | CCAGCACGCTGTTGTTAAAGAC                                                           |                                   |
| lacZ_L500F             | CTTCCGGCTCGTATGTTG                                                               |                                   |
| lacZ_L500BSAI_R        | CCAGGTCTCACTGGGATAACTGCCGTCCTCC                                                  |                                   |
| ReN20PAM2BSAI_F        | CCAGGTCTCACAGTTCATGTGCAGCTCCATC                                                  |                                   |
| ReN20PAM2_lacZ_BSAI_R  | CCAGGTCTCAGCCTCCGGCGCTAAAAATGCGCTCAGGTCAAATTCAGACGGCACAACGTCATCTCGTTCTC          |                                   |
| lacZ_R500BSAI_F        | CCAGGTCTCAAGGCTGGCTTTCGCTACCTGGAGAG                                              |                                   |
| lacZ_R500R             | TCGCGTTCCGGTTCCTACTAC                                                            | <i>LacZ</i> editing               |
| kan_re_lacZfullF       | CCAGGTCTCAagctCGTCGGAATTGCCAGCTGGG                                               |                                   |
| kan_re_fullR           | CCAGGTCTCAagtcTCAGAAGAAGCTCGTCAAGAAGGC                                           |                                   |
| lacZ_kan_R500BSAI_F    | CCAGGTCTCAgactGGCTTTCGCTACCTGGAGAG                                               |                                   |
| lacZ_genome_F          | AAAACCCCTGGCGTTACCCA                                                             |                                   |
| lacZ_genome_R          | CAGGCAGTCAATCAACTGTTTACC                                                         |                                   |
| ldhApm_L500F           | TACTTACACATCCCGCCATCAGCAGG                                                       |                                   |
| ldhApm_L500BSAI_R      | CCAGGTCTCACTGGTCCGATCCAAGTGCAGCGGCG                                              |                                   |
| ReN20PAM2BSAI_F        | CCAGGTCTCACAGTTCATGTGCAGCTCCATC                                                  |                                   |
| ReN20PAM2_ldhA_BSAI_R  | CCAGGTCTCATCCGATCCAAGTGCAGCGGCTGGAACCTCGGTGTGGAGCAACGTCATCTCGTTCTC               |                                   |
| ReN20PAM2_ldhAS_BSAI_R | CCAGGTCTCATCCGCAACGTCATCTCGTTCTC                                                 |                                   |
| ldhApm1_R500BSAI_F     | CCAGGTCTCACGGA <sup>Ceg aacg</sup> CCAGCAGACGCATACCAAAAACC                       | CRISPR-tolerant and PAM-free      |
| ldhApm2_R500BSAI_F     | CCAGGTCTCACGGA <sup>AtcA aacg</sup> CCAGCAGACGCATACCAAAAACC                      | regions editing                   |
| ldhApm3_R500BSAI_F     | CCAGGTCTCACGGA <sup>Atcg Gacg</sup> CCAGCAGACGCATACCAAAAACC                      |                                   |
| ldhApm4_R500BSAI_F     | CCAGGTCTCACGGA <sup>Atcg</sup> CCAGCAGACGCATACCAAAAACC                           |                                   |
| ldhApm_R500R           | CAACAGGTGAACGAGTCCTTTGGC                                                         |                                   |
| ldhA_genome_F          | TTAGCGCACATACCGGTC                                                               |                                   |
| ldhA_genome_R          | GCGCCTACACTAAGCATAGTTG                                                           |                                   |
| Poxb_L65F              | ccgcaagtgtactactattgcagctggtttccagccggagcagatcccacaagtactggcgaTTCATGTGCAGCTCCATC | <i>Poxb</i> deletion using simple |
| Poxb_R40L40QR          | CTTTTTCTCCACCAATGGAAGCAATGCACGCAGAGTCGAAATAGCTCTTGTTGGGTGGGTTTCCTGAAATA          | editing cassette construction     |
|                        | <u>GCCGCTGCAACGTCATCTCGTTCTC</u>                                                 | strage                            |

## CAGO technique protocol

### Step1: Editing cassette construction

#### (1) Amplification of modularized parts

The selection marker part with CRISPR/Cas9 recognition region (N20PAM) are PCR-amplified from plasmid pACYC184-M-crt with N20PAM sequence embedded in reverse primer, which is used as template for PCR amplification to add type IIS linkers. Primer pairs are designed as:

5'..TTCATGTGCAGCTCCATCACTGGAGCACCTCAAAAACACCA..3' and  
 5'..CAACGTCATCTCGTTCTCCGCTTATTTGTTAACTGTTAATTGTCCTTACTTTCGGTTCGATGGACTATTACGCCCCGCCCTGCCA..3'.

For genome deletion, three modularized parts are used for editing cassette construction. The primers used for amplification of each part are in the following table.

Table S5. Primers designed for modularized parts amplification in genome deletion experiment

| modularized parts      | Primers design                                                      |
|------------------------|---------------------------------------------------------------------|
| left homology arm (L)  | 5'.. 18~22nt forward primer..3'                                     |
|                        | 5'..CCAGGTCTCACTGG-18~22nt reverse primer..3'                       |
| marker with N20PAM     | 5'..CCAGGTCTCACCAGTTCATGTGCAGCTCCATC..3'                            |
|                        | 5'..CCAGGTCTCANNNN-40nt L_short-CAACGTCATCTCGTTTCTC..3 <sup>a</sup> |
| right homology arm (R) | 5'..CCAGGTCTCANNNN-18~22nt reverse primer..3'                       |
|                        | 5'.. 18~22nt reverse primer ..3'                                    |

<sup>a</sup> :The 40nt L\_short could be any DNA fragment upstream of L homologous arm as necessary.

<sup>b</sup> : “NNNN” was the 4 nt linkers between L\_short and R, was alterable as needed.

For genome insertion and replacement, four modularized parts are used for editing cassette construction, the primers used for amplification of each part are in the following table.

Table S6. Primers designed for modularized parts amplification in genome insertion and replacement experiment

| modularized parts      | Primers design                                                      |
|------------------------|---------------------------------------------------------------------|
| left homology arm (L)  | 5'.. 18~22nt forward primer..3'                                     |
|                        | 5'..CCAGGTCTCACTGG-18~22nt reverse primer..3'                       |
| marker with N20PAM     | 5'..CCAGGTCTCACCAGTTCATGTGCAGCTCCATC..3'                            |
|                        | 5'..CCAGGTCTCAGCCT-40nt L_short-CAACGTCATCTCGTTTCTC..3 <sup>a</sup> |
| insertion              | 5'..CCAGGTCTCAAGGC-18~22nt forward primer..3'                       |
|                        | 5'..CCAGGTCTCANNNN-18~22nt reverse primer..3' <sup>b</sup>          |
| right homology arm (R) | 5'..CCAGGTCTCANNNN-18~22nt reverse primer..3'                       |
|                        | 5'.. 18~22nt reverse primer ..3'                                    |

<sup>a</sup> :The 40nt L\_short could be any DNA frsgmmt upstream of L homologous arm as necessary.

<sup>b</sup> : “NNNN” was the 4 nt linkers between insertion part and R, was alterable as needed.

## (2) Modular parts assembly

Add around 100 ng of marker N20PAM part and equal molar amounts of the other assembly parts into a 15 µl total volume assembly reaction mixture:

marker N20PAM part (100 ng)  
+ each additional assembly parts (to equal molar with marker with N20PAM part)  
+ 1.5 µl 10X NEB T4 Buffer  
+ 0.15 µl 100X BSA  
+ 1 µl BsaI  
+ 1 µl NEB T4 Ligase, 2 million cohesive end units / mL  
+ dH2O to 15 µl

Perform the assembly reaction in a thermocycler with following condition:

3 min @ 37 C }  
4 min @ 16 C } 25 cycles  
5 min @ 50 C }  
5 min @ 80 C } 1 cycle

Forward primer of L and reverse primer of R are used for the amplification from the assembly reaction to get large number of editing cassette.

For genome deletion, the editing cassette could also be constructed by PCR amplification without assembly. The left homology arm (L) is embedded in the forward primer with a length of about 65bp, the right homology arm (R) and L\_short are embedded in the reverse primer with the length of 40bp for each. Two primers are designed as followed:

5'..65nt left homology arm-TTCATGTGCAGCTCCATC..3' and

5'..40nt reverse right homology arm-40nt reverse L\_short-CAACGTCATCTCGTTCTC..3'. The PCR product is the editing cassette for genome editing.

## **Step2: Procedure for genome editing**

MG1655 competent cells harboring pCAGO are prepared with IPTG induced λ-RED proteins. 50 µL competent cells are mixed with 400 ng editing cassette in a 2-mm Gene Pulser cuvette (Bio-Rad). After electroporation at 2.5 kV and suspended immediately in 1 ml of ice cold medium, cells are incubated for 2 hours at 30°C, and then plated on solid LB medium with ampicillin, chloramphenicol and 1% glucose.

For each editing experiment, five transformants are analyzed by colony PCR. A correct clone with inserted editing cassette is inoculated into LB media with ampicillin, IPTG, and L-arabinose for CRISPR/Cas9 system and λ-RED protein expression. After culturing for more than 6 hours, cells are plated on LB agar plates with ampicillin. Colonies are identified by colony PCR and the correct colonies are used for further verification by DNA sequencing.

### Step3: Plasmid curing and multiple rounds of genome editing

In edited strain, pCAGO is cured by growing overnight at 42°C. For consecutive editing, edited clone carrying pCAGO is used as parent strain for transformation of new editing DNA cassette.

### Sequencing data

Deletion of 9.53kb:

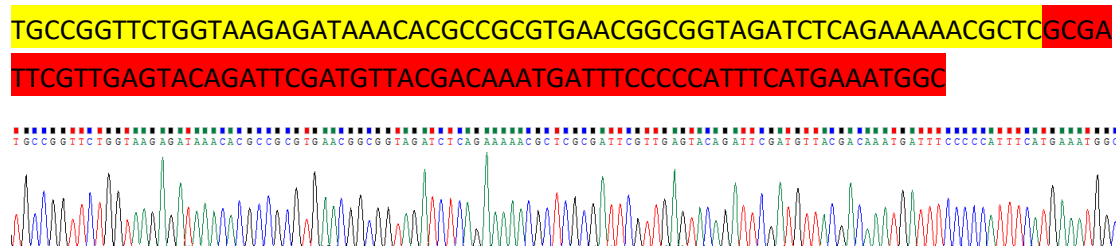

Deletion of 30.08kb:

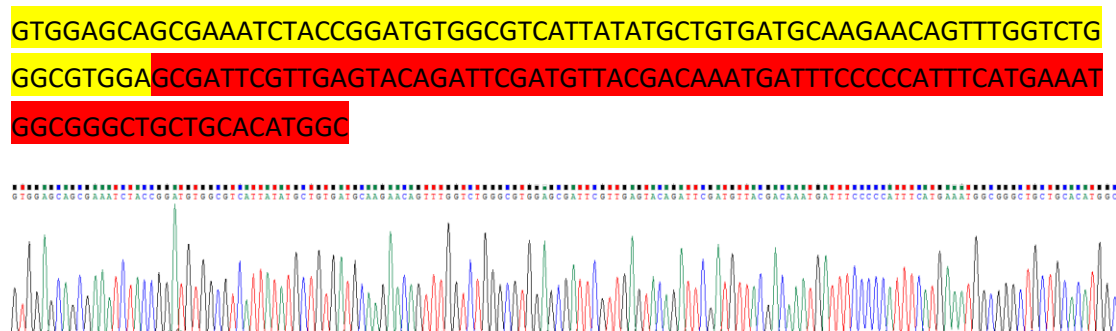

Deletion of 70.04kb:

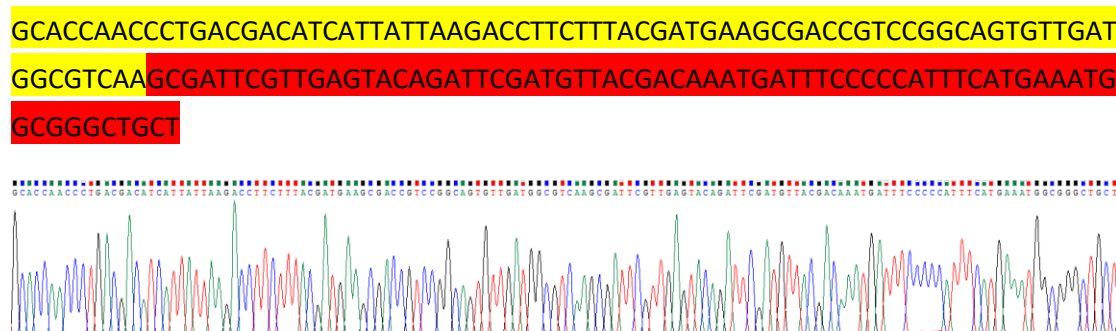

Deletion of 99.99kb:

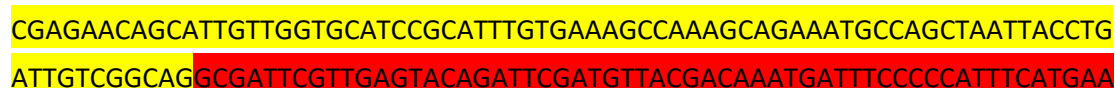

ATG

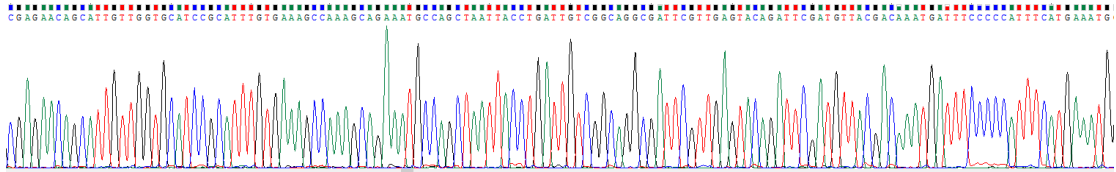

**LacZ deletion:** 1018bp was deleted from the *lacZ* gene

CATCGCGTGGGCGTATTCGCAAAGGATCAGCGGGCGGTCTCTCCAGGTAGCGAAAGCCA GCGGTT  
TTCTCCGGCGCGTAAAAATGCGCTCAGGTCAAATTCAGACGGCAAACGACTGTCCTGGCCGTAACCG

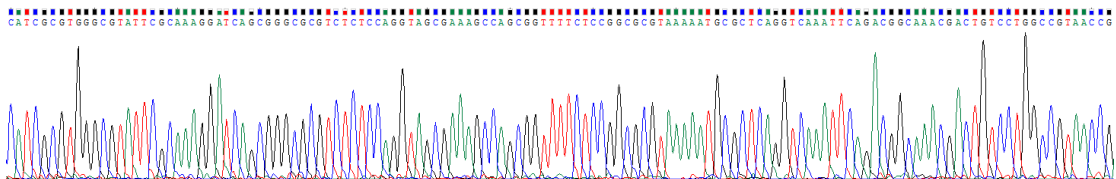

**Poxb deletion:** 443 bp was deleted from the *poxb* gene

CGCTTTATCCAGAACTTGCATCGGCTTTTTCTTCCACCAATGGAAGCAATGCACGCAGAGTCGACT  
TGATATCGCCGACCAGTGCCTGGTAACACGACAACCGAAACGCCACGGTTAAGCACCGCTTTGCGCA  
TGGCAAT

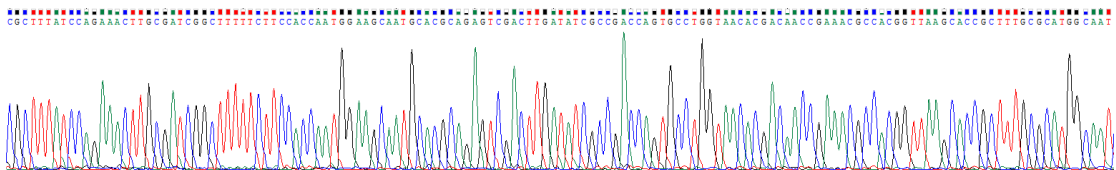

**Poxb deletion using simple editing cassette construction strage:** 587bp was deleted from the *poxb* gene

GCTTTATCCAGAACTTGCATCGGCTTTTTCTTCCACCAATGGAAGCAATGCACGCAGAGTCGAAAT  
AGCTCTGTGGGTGGGTTTCTGGAAATAGCCGCTGCCAATTCGCTGGAGGGAATATGAGCGGCA  
ATCG

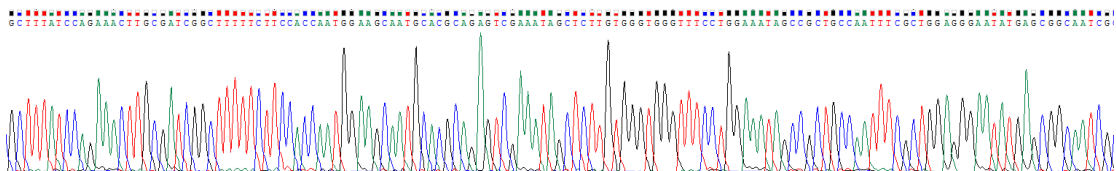

**LacZ replaced by kan:** 1018bp of *lacZ* was replaced by 915 bp fragment derived from the *kan* gene

Forward



AGGACAGTCGTTGCCGTCTGAATTTGACCTGAGCGCATTTTTAGGCGCCGGAGAAAACCGCTCGTCT  
GGAATTGCCAGCTGGGGCGCCCTCTGGTAAGGTTGGGAAGCCCTGCAAAGTAAACTGGATGGCTTT  
CTTGCCGCCAA

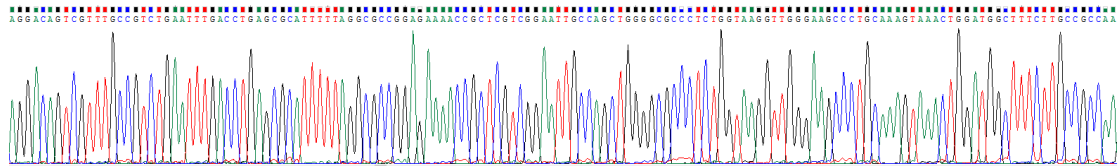

Reverse

AGACTGTTACCCATCGCGTGGGCGTATTGCAAAGGATCAGCGGGCGCTCTCCAGGTAGCGAA  
AGCCAGTCTCAGAAGAAGTCTCAAGAAGGCGATAGAAGGCGATGCGCTGCGAATCGGGAGCGGC  
GATACCGT

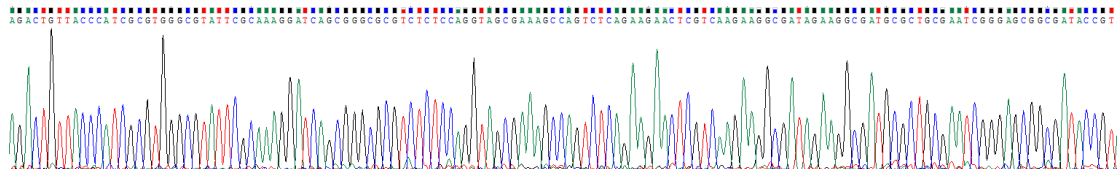

*Poxb* replaced by *kan*: 443 bp of *poxb* was replaced by 915 bp fragment derived from the *kan* gene

Forward

ATCCACAAGTACTGGCGATTGCCATGCGCAAAGCGGTGCTTAACCGTGGCGTTTCGGTTGTCGTGT  
TACCAGGCCGTCGGAATTGCCAGCTGGGGCGCCCTCTGGTAAGGTTGGGAAGCCCTGC

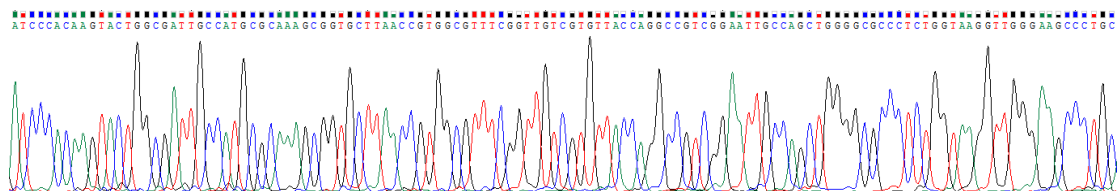

Reverse

CCAGCGCTTTATCCAGAAACTTGCATCGGCTTTTTCTCCACCAATGGAAGCAATGCACGCAGAGTC  
GACTTGATATCGCCGACCAGTAGTCTCAGAAGAAGTCTCAAGAAGGCGATAGAAGGCGATGCGCT  
GCG

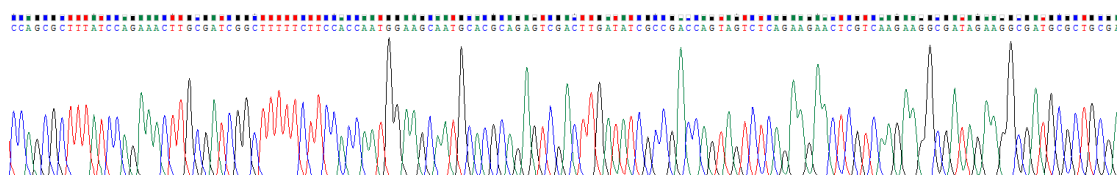

## pCAGO Sequence

>

CACAACCGGCACGGAACCTCGCTCGGGCTGGCCCCGGTGCATTTTTTAAATACCCG  
CGAGAAATAGAGTTGATCGTCAAACCAACATTGCGACCGACGGTGGCGATAGG  
CATCCGGGTGGTGCTCAAAGCAGCTTCGCTGGCTGATACGTTGGTCCTCGCGC  
CAGCTTAAGACGCTAATCCCTAACTGCTGGCGGAAAAGATGTGACAGACGCGAC  
GGCGACAAGCAAACATGCTGTGCGACGCTGGCGATATCAAATTGCTGTCTGCCA  
GGTGATCGCTGATGTACTGACAAGCCTCGCGTACCCGATTATCCATCGGTGGATG  
GAGCGACTCGTTAATCGCTTCCATGCGCCGCAGTAACAATTGCTCAAGCAGATTT  
ATCGCCAGCAGCTCCGAATAGCGCCCTTCCCCTTGCCCGGCGTTAATGATTTGCC  
CAAACAGGTCGCTGAAATGCGGCTGGTGGCTTCATCCGGGCGAAAGAACCCCG  
TATTGGCAAATATTGACGGCCAGTTAAGCCATTCATGCCAGTAGGCGCGCGGACG  
AAAGTAAACCCACTGGTGATAACCATTGCGGAGCCTCCGGATGACGACCGTAGTG  
ATGAATCTCTCCTGGCGGGAACAGCAAATATCACCCGGTCGGCAAACAAATTCT  
CGTCCCTGATTTTTACCACCCCTGACCGCGAATGGTGAGATTGAGAATATAAC  
CTTTCATTCCCAGCGGTTCGGTTCGATAAAAAAATCGAGATAACCGTTGGCCTCAAT  
CGGCGTTAAACCCGCCACCAGATGGGCATTAAACGAGTATCCCGGCAGCAGGGG  
ATCATTTTGCCTTCAGCCATACTTTTCATACTCCCGCCATTGAGAGAAGAAACCA  
ATTGTCCATATTGCATCAGACATTGCCGTCACTGCGTCTTTTACTGGCTCTTCTCG  
CTAACCAAACCGGTAACCCCGCTTATTAAGCATTCTGTAACAAAGCGGGACCA  
AAGCCATGACAAAACGCGTAACAAAAGTGTCTATAATCACGGCAGAAAAGTCC  
ACATTGATTATTTGCACGGCGTCACACTTTGCTATGCCATAGCATTTTTATCCATA  
AGATTAGCGGATCCTACCTGACGCTTTTTATCGCAACTCTCTACTGTTTCTCCATA  
CCCGTTTTTTGGGAATTTCGAGCTCTAAGGAGGTTATAAAAAATGGATAAGAAAT  
ACTCAATAGGCTTAGATATCGGCACAAATAGCGTCGGATGGGCGGTGATCACTG  
ATGAATATAAGGTTCCGTCTAAAAGTTCAAGGTTCTGGGAAATACAGACCGCCA  
CAGTATCAAAAAAATCTTATAGGGGCTCTTTTATTTGACAGTGGAGAGACAGCG  
GAAGCGACTCGTCTCAAACGGACAGCTCGTAGAAGGTATACACGTCGGAAGAAT  
CGTATTTGTTATCTACAGGAGATTTTTTCAAATGAGATGGCGAAAGTAGATGATA  
GTTTCTTTCATCGACTTGAAGAGTCTTTTTTGGTGGAAAGAAGACAAGAAGCATGA  
ACGTCATCCTATTTTTGGAAATATAGTAGATGAAGTTGCTTATCATGAGAAATAT  
CCAATATCTATCATCTGCGAAAAAATTGGTAGATTCTACTGATAAAGCGGATT  
TGCGCTTAATCTATTTGGCCTTAGCGCATATGATTAAGTTTCGTGGTCATTTTTTG  
ATTGAGGGAGATTTAAATCCTGATAATAGTGATGTGGACAAACTATTTATCCAGT  
TGGTACAAACCTACAATCAATTATTTGAAGAAAACCCTATTAACGCAAGTGGAGT  
AGATGCTAAAGCGATTCTTCTGCACGATTGAGTAAATCAAGACGATTAGAAAAT  
CTCATTGCTCAGCTCCCCGGTGAGAAGAAAAATGGCTTATTTGGGAATCTCATTG  
CTTTGTCATTGGGTTTGACCCCTAATTTTAAATCAAATTTTGATTTGGCAGAAGAT

GCTAAATTACAGCTTTCAAAAGATACTTACGATGATGATTTAGATAAATTTATTGG  
CGCAAATTGGAGATCAATATGCTGATTTGTTTTTGGCAGCTAAGAATTTATCAGA  
TGCTATTTTACTTTCAGATATCCTAAGAGTAAATACTGAAATAACTAAGGCTCCC  
CTATCAGCTTCAATGATTAACGCTACGATGAACATCATCAAGACTTGACTCTTTT  
AAAAGCTTTAGTTTCGACAACAACCTCCAGAAAAGTATAAAGAAATCTTTTTTGAT  
CAATCAAAAAACGGATATGCAGGTTATATTGATGGGGGAGCTAGCCAAGAAGAA  
TTTTATAAATTTATCAAACCAATTTTAGAAAAAATGGATGGTACTGAGGAATTAT  
TGGTGAAACTAAATCGTGAAGATTTGCTGCGCAAGCAACGGACCTTTGACAACG  
GCTCTATTCCCATCAAATTCACTTGGGTGAGCTGCATGCTATTTTGAGAAGACA  
AGAAGACTTTTATCCATTTTTAAAAGACAATCGTGAGAAGATTGAAAAAATCTTG  
ACTTTTCGAATTCCTTATTATGTTGGTCCATTGGCGCGTGGCAATAGTCGTTTTGC  
ATGGATGACTCGGAAGTCTGAAGAAACAATTACCCCATGGAATTTTGAAGAAGTT  
GTCGATAAAGGTGCTTCAGCTCAATCATTTATTGAACGCATGACAACTTTGATA  
AAAATCTTCAAATGAAAAAGTACTACCAAACATAGTTTGCTTTATGAGTATTT  
TACGGTTTATAACGAATTGACAAAGGTCAAATATGTTACTGAAGGAATGCGAAA  
ACCAGCATTTCTTTCAGGTGAACAGAAGAAAGCCATTGTTGATTTACTCTTCAAA  
ACAAATCGAAAAGTAACCGTTAAGCAATTAAGAAGATTATTTCAAAAAAATA  
GAATGTTTTGATAGTGTGAAATTTCAGGAGTTGAAGATAGATTTAATGCTTCATT  
AGGTACCTACCATGATTTGCTAAAAATTATTAAGATAAAGATTTTTTGGATAAT  
GAAGAAAATGAAGATATCTTAGAGGATATTGTTTTAACATTGACCTTATTTGAAG  
ATAGGGAGATGATTGAGGAAAGACTTAAAACATATGCTCACCTCTTTGATGATAA  
GGTGATGAAACAGCTTAAACGTCGCCGTTATACTGGTTGGGGACGTTTGTCTCGA  
AAATTGATTAATGGTATTAGGGATAAGCAATCTGGCAAACAATATTAGATTTTT  
TGAAATCAGATGGTTTTGCCAATCGCAATTTTATGCAGCTGATCCATGATGATAG  
TTTGACATTTAAGAAGACATTCAAAAAGCACAAAGTGTCTGGACAAGGCGATAG  
TTTACATGAACATATTGCAAATTTAGCTGGTAGCCCTGCTATTA AAAAAGGTATT  
TTACAGACTGTAAAAGTTGTTGATGAATTGGTCAAAGTAATGGGGCGGCATAAGC  
CAGAAAATATCGTTATTGAAATGGCACGTGAAAATCAGACAACCTCAAAGGGCC  
AGAAAAATTCGCGAGAGCGTATGAAACGAATCGAAGAAGGTATCAAAGAATTAG  
GAAGTCAGATTCTTAAAGAGCATCCTGTTGAAAATACTCAATTGCAAAAATGAAAA  
GCTCTATCTCTATTATCTCCAAAATGGAAGAGACATGTATGTGGACCAAGAATTA  
GATATTAATCGTTTAAAGTGATTATGATGTGATCACATTGTTCCACAAAGTTTCCT  
TAAAGACGATTCAATAGACAATAAGGTCTTAACGCGTTCTGATAAAAATCGTGGT  
AAATCGGATAACGTTCCAAGTGAAGAAGTAGTCAAAAAGATGAAAACTATTGG  
AGACAACCTTCTAAACGCCAAGTTAATCACTCAACGTAAGTTTGATAATTTAACGA  
AAGCTGAACGTGGAGGTTTGAGTGAACCTTGATAAAGCTGGTTTTATCAAACGCCA  
ATTGGTTGAAACTCGCCAAATCACTAAGCATGTGGCACAAATTTTGGATAGTCGC  
ATGAATACTAAATACGATGAAAATGATAAACTTATTCGAGAGGTTAAAGTGATTA  
CCTTAAAATCTAAATTAGTTTCTGACTTCCGAAAAGATTTCCAATTCTATAAAGTA

CGTGAGATTAACAATTACCATCATGCCCATGATGCGTATCTAAATGCCGTCGTTG  
GAACTGCTTTGATTAAGAAATATCCAAAACCTTGAATCGGAGTTTGTCTATGGTGA  
TTATAAAGTTTATGATGTTTCGTAAAATGATTGCTAAGTCTGAGCAAGAAATAGGC  
AAAGCAACCGCAAAATATTTCTTTTACTCTAATATCATGAACTTCTTCAAAACAG  
AAATTACACTTGCAAATGGAGAGATTCGCAAACGCCCTCTAATCGAAACTAATGG  
GGAAACTGGAGAAATTGTCTGGGATAAAGGGCGAGATTTTGCCACAGTGCGCAA  
AGTATTGTCCATGCCCAAGTCAATATTGTCAAGAAAACAGAAGTACAGACAGG  
CGGATTCTCCAAGGAGTCAATTTTACCAAAAAGAAATTCGGACAAGCTTATTGCT  
CGTAAAAAAGACTGGGATCCAAAAAATATGGTGGTTTTTGATAGTCCAACGGTA  
GCTTATTCAGTCCTAGTGGTTGCTAAGGTGGAAAAAGGGAAATCGAAGAAGTTA  
AAATCCGTTAAAGAGTTACTAGGGATCACAATTATGGAAAGAAGTTCCTTTGAAA  
AAAATCCGATTGACTTTTTTAGAAGCTAAAGGATATAAGGAAGTTAAAAAAGACT  
TAATCATTAAACTACCTAAATATAGTCTTTTTGAGTTAGAAAACGGTCGTAAACG  
GATGCTGGCTAGTGCCGGAGAATTACAAAAAGGAAATGAGCTGGCTCTGCCAAG  
CAAATATGTGAATTTTTTATATTTAGCTAGTCATTATGAAAAGTTGAAGGGTAGT  
CCAGAAGATAACGAACAAAAACAATTGTTTTGTGGAGCAGCATAAGCATTATTTA  
GATGAGATTATTGAGCAAATCAGTGAATTTTCTAAGCGTGTTATTTTAGCAGATG  
CCAATTTAGATAAAGTTCTTAGTGATATAACAAACATAGAGACAAACCAATACG  
TGAACAAGCAGAAAATATTATTCATTTATTTACGTTGACGAATCTTGGAGCTCCC  
GCTGCTTTTAAATATTTTGATACAACAATTGATCGTAAACGATATACGTCTACAA  
AAGAAGTTTTAGATGCCACTCTTATCCATCAATCCATCACTGGTCTTTATGAAACA  
CGCATTGATTTGAGTCAGCTAGGAGGTGACTGAGCATCAAATAAAACGAAAGGC  
TCAGTCGAAAGACTGGGCCTTTCGTTTTATCTGTCTAGGTTTATACATAGGCGAGT  
ACTCTGTTATGGAGTCAGATCTTAGCTAGTCCATCGAACCGAAGTAGTTTTAGAG  
CTAGAAATAGCAAGTTAAAATAAGGCTAGTCCGTTATCAACTTGAAAAAGTGGC  
ACCGAGTCGGTGCTTAGCATCCAACTCGAGTAAGGATCTCCAGGCATCAAATAA  
AACGAAAGGCTCAGTCGAAAGACTGGGCCTTTCGTTTTATCTGTTGTTTGTCCGT  
GAACGCTCTCTACTAGAGTCACACTGGCTCACCTTCGGGTGGGCCTTTCTGCGTTT  
ATACCTAGGGCGTTCGGCTGCGGCTCTACTTTTGTGTTAGTCTTGATGCTTCAC  
TGATAGATAAAGAGCCATAAGAACCTCAGATCCTTCCGTATTTAGCCAGTATGT  
TCTCTCCATACGATATAAGTTGTAATTCTCATGTTTGACAGCTTATCATCGTTAAT  
TAACTAGTCATATGGGCATGCATTTACGTTGACACCATCGAATGGTGCAAAACCT  
TTCGCGGTATGGCATGATAGCGCCCGAAGAGAGTCAATTCAGGGTGGTGAATG  
TGAAACCAGTAACGTTATACGATGTCGCAGAGTATGCCGGTGTCTCTTATCAGAC  
CGTTTCCC CGTGGTGAACCAGGCCAGCCACGTTTCTGCGAAAACGCGGGAAAA  
AGTGGAAGCGGCGATGGCGGAGCTGAATTACATTCCAACCGCGTGGCACAACA  
ACTGGCGGGCAAACAGTCGTTGCTGATTGGCGTTGCCACCTCCAGTCTGGCCCTG  
CACGCGCCGTCGCAAATTGTCGCGGCGATTAAATCTCGCGCCGATCAACTGGGTG  
CCAGCGTGGTGGTGTGATGGTAGAACGAAGCGGCGTCAAGCCTGTAAAGCGG

CGGTGCACAATCTTCTCGCGCAACGCGTCAGTGGGCTGATCATTAACTATCCGCT  
GGATGACCAGGATGCCATTGCTGTGGAAGCTGCCTGCACTAATGTTCCGGCGTTA  
TTTCTTGATGTCTCTGACCAGACACCCATCAACAGTATTATTTTCTCCCATGAAGA  
CGGTACGCGACTGGGCGTGGAGCATCTGGTTCGCATTGGGTCACCAGCAAATCGC  
GCTGTTAGCGGGCCCATTAAGTTCTGTCTCGGCGCGTCTGCGTCTGGCTGGCTGG  
CATAAATATCTCACTCGCAATCAAATTCAGCCGATAGCGGAACGGGAAGGCGAC  
TGGAGTGCCATGTCCGGTTTTCAACAAACCATGCAAATGCTGAATGAGGGCATCG  
TTCCCACTGCGATGCTGGTTGCCAACGATCAGATGGCGCTGGGCGCAATGCGCGC  
CATTACCGAGTCCGGGCTGCGCGTTGGTTCGGATATCTCGGTAGTGGGATACGAC  
GATACCGAAGACAGCTCATGTTATATCCCGCCGTTAACCACCATCAAACAGGATT  
TTCGCTGCTGGGGCAAACCAGCGTGGACCGCTTGCTGCAACTCTCTCAGGGCCA  
GGCGGTGAAGGGCAATCAGCTGTTGCCCGTCTCACTGGTGAAAAGAAAAACCAC  
CCTGGCGCCAATACGCAAACCGCCTCTCCCCGCGCGTTGGCCGATTCATTAATG  
CAGCTGGCACGACAGGTTTTCCCGACTGGAAAGCGGGCAGTGAGCGCAACGCAAT  
TAATGTGAGTTAGCGGAATTGATCTGGTTTGACAGCTTATCATCGACTGCACGG  
TGCACCAATGCTTCTGGCGTCAGGCAGCCATCGGAAGCTGTGGTATGGCTGTGCA  
GGTCGTAAATCACTGCATAATTCGTGTGCTCAAGGCGCACTCCCGTTCTGGATA  
ATGTTTTTTGCGCCGACATCATAACGGTTCTGGCAAATATTCTGAAATGAGCTGTT  
GACAATTAATCATCCGGCTCGTATAATGTGTGGAATTGTGAGCGGATAACAATTT  
CACACAGGAAACAGACCATGGAATTC AAGGAGATATAACCATGGATATTAATACT  
GAAACTGAGATCAAGCAAAGCATTCACTAACCCCTTTCTGTTTTCTAATCA  
GCCCCGCATTTTCGCGGGCGATATTTTCACAGCTATTTTCAGGAGTTCAGCCATGAA  
CGTTATTACATTCAGGATCGTCTTGAGGCTCAGAGCTGGGCGCGTCACTACCAG  
CAGCTCGCCCGTGAAGAGAAAGAGGCAGAACTGGCAGACGACATGGAAAAAGG  
CCTGCCCCAGCACCTGTTTGAATCGCTATGCATCGATCATTTGCAACGCCACGGG  
GCCAGCAAAAAATCCATTACCCGTGCGTTTGATGACGATGTTGAGTTTCAGGAGC  
GCATGGCAGAACACATCCGGTACATGGTTGAAACCATTGCTCACCACCAGGTTGA  
TATTGATTCAGAGGTATAAAACGAATGAGTACTGCACTCGCAACGCTGGCTGGGA  
AGCTGGCTGAACGTGTCGGCATGGATTCTGTGACCCACAGGAACTGATCACCAC  
TCTTCGCCAGACGGCATTAAAGGTGATGCCAGCGATGCGCAGTTCATCGCATT  
CTGATCGTTGCCAACAGTACGGCCTTAATCCGTGGACGAAAGAAATTTACGCCT  
TTCCTGATAAGCAGAATGGCATCGTTCCGGTGGTGGGCGTTGATGGCTGGTCCCG  
CATCATCAATGAAAACCAGCAGTTTGATGGCATGGACTTTGAGCAGGACAATGA  
ATCCTGTACATGCCGATTTACCGCAAGGACCGTAATCATCCGATCTGCGTTACC  
GAATGGATGGATGAATGCCGCCGCAACCATTCAAACCTCGCGAAGGCAGAGAA  
ATCACGGGGCCGTGGCAGTCGCATCCCAAACGGATGTTACGTCATAAAGCCATG  
ATTCAGTGTGCCCGTCTGGCCTTCGGATTTGCTGGTATCTATGACAAGGATGAAG  
CCGAGCGCATTGTCGAAAATACTGCATACTGCAGAACGTCAGCCGGAACGCG  
ACATCACTCCGGTTAACGATGAAACCATGCAGGAGATTAACACTCTGCTGATCGC

CCTGGATAAAACATGGGATGACGACTTATTGCCGCTCTGTTCCCAGATATTTTCGC  
CGCGACATTCGTGCATCGTCAGAACTGACACAGGCCGAAGCAGTAAAAGCTCTT  
GGATTCCTGAAACAGAAAGCCGCAGAGCAGAAGGTGGCAGCATGACACCGGACA  
TTATCCTGCAGCGTACCGGGATCGATGTGAGAGCTGTCGAACAGGGGGATGATG  
CGTGGCACAAATTACGGCTCGGCGTCATCACCGCTTCAGAAGTTCACAACGTGAT  
AGCAAAACCCCGCTCCGGAAAGAAGTGGCCTGACATGAAAATGTCCTACTTCCA  
CACCTGCTTGCTGAGGTTTGCACCGGTGTGGCTCCGGAAGTTAACGCTAAAGCA  
CTGGCCTGGGGAAAACAGTACGAGAACGACGCCAGAACCCTGTTTGAATTCACTT  
CCGGCGTGAATGTTACTGAATCCCGATCATCTATCGCGACGAAAGTATGCGTAC  
CGCCTGCTCTCCCGATGGTTTATGCAGTGACGGCAACGGCCTTGAAGTAAATGC  
CCGTTTACCTCCCGGGATTTTCATGAAGTTCGGGCTCGGTGGTTCGAGGCCATAA  
AGTCAGCTTACATGGCCCAGGTGCAGTACAGCATGTGGGTGACGCGAAAAAATG  
CCTGGTACTTTGCCAACTATGACCCGCGTATGAAGCGTGAAGGCCTGCATTATGT  
CGTGATTGAGCGGGATGAAAAGTACATGGCGAGTTTTGACGAGATCGTGCCGGA  
GTTTCATCGAAAAAATGGACGAGGCACTGGCTGAAATTGGTTTTGTATTTGGGGAG  
CAATGGCGATGACGCATCCTCACGATAATATCCGGGTAGGCGCAATCACTTTCGT  
CTACTCCGTTACAAAGCGAGGCTGGGTATTTCCCGGCCTTCTGTTATCCGAAATC  
CACTGAAAGCACAGCGGCTGGCTGAGGAGATAAATAATAAACGAGGGGCTGTAT  
GCACAAAGCATCTTCTGTTGAGTTAAGAACGAGTATCGAGATGGCACATAGCCTT  
GCTCAAATTGGAATCAGGTTTGTGCCAATACCAGTAGAAACAGACGAAGAATCC  
ATGGGTATGGACAGTTTTCCCTTTGATATGTAACGGTGAACAGTTGTTCTACTTTT  
GTTTGTAGTCTTGATGCTTCACTGATAGATAACAAGAGCCATAAGAACCTCAGAT  
CCTCCGATTTAGCCAGTATGTTCTCTAGTGTGGTTCGTTGTTTTTGCGTGAGCC  
ATGAGAACGAACCATTGAGATCATACTTACTTTGCATGTCACTCAAAAATTTTGC  
CTCAAACTGGTGAGCTGAATTTTTGCAGTTAAAGCATCGTGTAGTGTTTTTCTTA  
GTCCGTTACGTAGGTAGGAATCTGATGTAATGGTTGTTGGTATTTTGTACCATT  
ATTTTTATCTGGTTGTTCTCAAGTTCGGTTACGAGATCCATTTGTCTATCTAGTTCA  
ACTTGAAAATCAACGTATCAGTCGGGCGGCCTCGCTTATCAACCACCAATTTCA  
TATTGCTGTAAGTGTTTAAATCTTACTTATTGGTTTCAAACCCATTGGTTAAGC  
CTTTAAACTCATGGTAGTTATTTCAAGCATTAACATGAACTTAAATTCATCAAG  
GCTAATCTCTATATTTGCCTTGTGAGTTTTCTTTTGTGTTAGTTCTTTTAATAACCA  
CTCATAAATCCTCATAGAGTATTTGTTTTCAAAGACTTAACATGTTCCAGATTAT  
ATTTTATGAATTTTTTAACTGGAAAAGATAAGGCAATATCTCTTCACTAAAACT  
AATTCTAATTTTTCGCTTGAGAACTTGGCATAGTTTGTCCACTGGAAAATCTCAA  
GCCTTAAACCAAGGATTCCTGATTTCCACAGTTCTCGTCATCAGCTCTCTGGTTG  
CTTTAGCTAATAACCCATAAGCATTTCCTACTGATGTTTCATCATCTGAGCGTAT  
TGGTTATAAGTGAACGATACCGTCCGTTCTTTCCTTGTAGGGTTTTCAATCGTGGG  
GTTGAGTAGTGCCACACAGCATAAAATTAGCTTGGTTTCATGCTCCGTTAAGTCA  
TAGCGACTAATCGCTAGTTCATTTGCTTTGAAAACAATAATTCAGACATACATC

TCAATTGGTCTAGGTGATTTTAATCACTATACCAATTGAGATGGGCTAGTCAATG  
ATAATTACTAGTCCTTTTCTTTGAGTTGTGGGTATCTGTAAATTCTGCTAGACCT  
TTGCTGGAAAACCTGTAAATTCTGCTAGACCCTCTGTAAATTCCGCTAGACCTTTG  
TGTGTTTTTTTTGTTTATATTCAAGTGGTTATAATTTATAGAATAAAGAAAGAATA  
AAAAAAGATAAAAAGAATAGATCCCAGCCCTGTGTATAACTCACTACTTTAGTCA  
GTTCCGCAGTATTACAAAAGGATGTGCGAAACGCTGTTTGCTCCTCTACAAAACA  
GACCTTAAAACCCTAAAGGCTTAAGTAGCACCCCTCGCAAGCTCGGTTGCGGCCGC  
AATCGGGCAAATCGCTGAATATTCCTTTTGTCTCCGACCATCAGGCACCTGAGTC  
GCTGTCTTTTTCTGTGACATTCAGTTCGCTGCGCTCACGGCTCTGGCAGTGAATGGG  
GGTAAATGGCACTACAGGCGCCTTTTATGGATTCATGCAAGGAAACTACCCATAA  
TACAAGAAAAGCCCGTCACGGGCTTCTCAGGGCGTTTTATGGCGGGTCTGCTATG  
TGGTGCTATCTGACTTTTTGCTGTTTCAGCAGTTCCTGCCCTCTGATTTTCCAGTCTG  
ACCACTTCGGATTATCCCGTGACAGGTCAATTCAGACTGGCTAATGCACCCAGTAA  
GGCAGCGGTATCATCAACGGGGTCTGACGCTCAGTGGAACGAAAACCTCACGTTA  
AGGGATTTTGGTCATGAGATTATCAAAAAGGATCTTCACCTAGATCCTTTTAAAT  
TAAAAATGAAGTTTTAAATCAATCTAAAGTATATATGAGTAAACTTGGTCTGACA  
GTTACCAATGCTTAATCAGTGAGGCACCTATCTCAGCGATCTGTCTATTTTCGTTCA  
TCCATAGTTGCCTGACTCCCCGTCGTGTAGATAACTACGATACGGGAGGGCTTAC  
CATCTGGCCCCAGTGCTGCAATGATACCGCGAGACCCACGCTCACCGGCTCCAGA  
TTTATCAGCAATAAACCAGCCAGCCGGAAGGGCCGAGCGCAGAAGTGGTCCTGC  
AACTTTATCCGCCTCCATCCAGTCTATTAATTGTTGCCGGAAGCTAGAGTAAGT  
AGTTCGCCAGTTAATAGTTTGCGCAACGTTGTTGCCATTGCTACAGGCATCGTGG  
TGTCACGCTCGTCGTTTGGTATGGCTTCATTCAGCTCCGGTTCCCAACGATCAAGG  
CGAGTTACATGATCCCCATGTTGTGCAAAAAGCGGTTAGCTCCTTCGGTCCTC  
CGATCGTTGTCAGAAGTAAGTTGGCCGAGTGTATCACTCATGGTTATGGCAGC  
ACTGCATAATTCTCTTACTGTCATGCCATCCGTAAGATGCTTTTTCTGTGACTGGTG  
AGTACTCAACCAAGTCATTCTGAGAATAGTGTATGCGGCGACCGAGTTGCTCTTG  
CCCGGCGTCAATACGGGATAATACCGCGCCACATAGCAGAACTTTAAAAGTGCTC  
ATCATTGGAAAACGTTCTTCGGGGCGAAAACCTCTCAAGGATCTTACCGCTGTTGA  
GATCCAGTTCGATGTAACCCACTCGTGCACCCAACTGATCTTCAGCATCTTTTACT  
TTCACCAGCGTTTCTGGGTGAGCAAAAACAGGAAGGCAAAATGCCGCAAAAAG  
GGAATAAGGGCGACACGGAAATGTTGAATACTCATACTTTCCTTTTTCAATATT  
ATTGAAGCATTATCAGGGTTATTGTCTCATGAGCGGATACATATTTGAATGTATT  
TAGAAAAATAAACAATAGGGGTTCCGCGCACATTTCCCCGAAAAGTGCCACCT  
GCATCGATTTATTATGACAACCTTGACGGCTACATCATTCACTTTTTCTT
